# Supplementary material for: Telomere shortening leads to earlier age of onset in ALS mice
Source: publisher site journal article supplement (doi:10.18632/aging.100904), 2016-02-24
Supplement: Supplementary file [file aging-v8i2-100904-supplementary-material-SD1.pdf]

SUPPLEMENTAL DATA

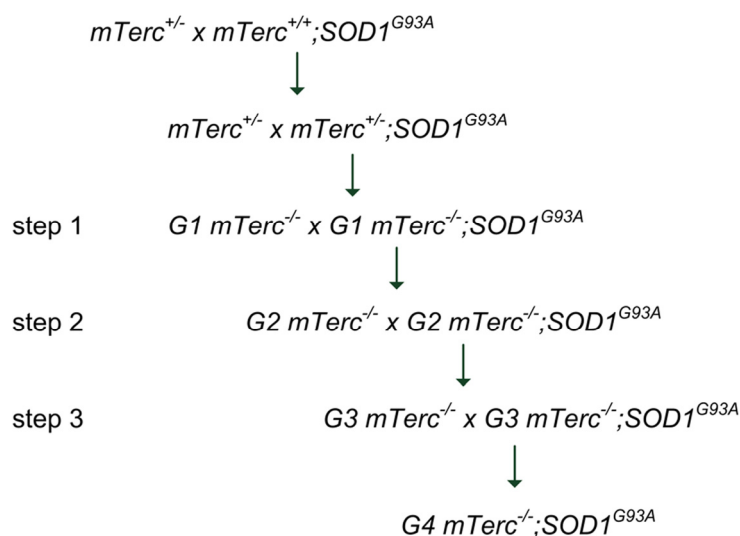

Supplemental Figure 1.

Supplemental Table 1.

| Characteristics of human cases |        |     |                                                     |
|--------------------------------|--------|-----|-----------------------------------------------------|
| ID                             | gender | age | cause of death                                      |
| ALS #1                         | m      | 66  | pneumonia, coronary heart disease                   |
| ALS #2                         | m      | 50  | ALS                                                 |
| ALS #3                         | m      | 69  | respiratory insufficiency in ALS                    |
| ALS #4                         | m      | 75  | N/K                                                 |
| ALS #5                         | m      | 25  | N/K                                                 |
| ALS #6                         | m      | 84  | chronic heart insufficiency, coronary heart disease |
| ALS #7                         | m      | 43  | ALS, pneumonia                                      |
| ALS #8                         | m      | 68  | bronchopneumonia                                    |
| ALS #9                         | m      | 74  | respiratory insufficiency in ALS                    |
| ALS #10                        | m      | 63  | lymphoplasmocytic lymphoma                          |
| ALS #11                        | f      | 56  | N/K                                                 |
| ID                             | gender | age | cause of death                                      |
| Control #1                     | m      | 45  | myocardial infarction, coronary heart disease       |
| Control #2                     | m      | 53  | pneumonia                                           |
| Control #3                     | m      | 56  | chronic myelogenous leukaemia                       |
| Control #4                     | m      | 58  | pulmonary embolism                                  |
| Control #5                     | m      | 46  | pulmonary hypertonia, tricuspid insufficiency       |
| Control #6                     | m      | 80  | acute heart failure, coronary heart disease         |
| Control #7                     | m      | 62  | carcinoma                                           |
| Control #8                     | f      | 68  | liver cirrhosis, hepatitis                          |
| Control #9                     | m      | 57  | myocardial infarction, lung emphysema               |
| Control #10                    | m      | 64  | myocardial infarction, coronary heart disease       |
| Control #11                    | m      | 53  | myocardial infarction, coronary heart disease       |
| Control #12                    | m      | 59  | liver cirrhosis                                     |
| Control #13                    | f      | 67  | multi-organ failure, coronary heart disease         |

N/K= not known; ALS = Amyotrophic lateral sclerosis

**Supplemental Table 2.**

| Telomere length of human cell lines |                                  |                  |                 |
|-------------------------------------|----------------------------------|------------------|-----------------|
| <b>Cell line</b>                    | <b>Mean telomere length (kb)</b> | <b>Origin</b>    | <b>Company</b>  |
| HeLa 229                            | 2.77                             | cervical cancer  | ATCC® CCL-2.1   |
| HCT116                              | 3.6                              | colon carcinoma  | ATCC® CCL-247   |
| 293THEK                             | 7.27                             | embryonic kidney | ATCC® PTA-5554  |
| PBMC                                | 10.1                             | peripheral blood | ATCC® CRL-11968 |
| IMR90h TERT                         | 10.69                            | fetal lung       | ATCC® CCL-186   |
| kb = kilobases                      |                                  |                  |                 |
